# Supplementary material for: Covid-19 in outpatients—Is fever a useful indicator for SARS-CoV-2 infection?
Source: PubMed Central journal article supplement (PMC7857607; doi:10.1371/journal.pone.0246312), 2021-02-03
Supplement: pone.0246312.s002.pdf [file pone.0246312.s002.pdf]

**Fragebogen bestätigter COVID-19-Fälle aus der Corona-Ambulanz**

Wohnsituation (alleine, Familie, WG etc.):

Symptombeginn:

Datum des positiven Abstrichs:

**Tägliche telefonische Erhebung folgender Symptome bis 14 Tage ab positivem Test:**

**→ Bei subj. Verschlechterung Info an Arzt ←**

|                                     |  |  |  |  |  |  |  |
|-------------------------------------|--|--|--|--|--|--|--|
| <b>Datum</b>                        |  |  |  |  |  |  |  |
| <b>Subj. Verschlechterung (j/n)</b> |  |  |  |  |  |  |  |
| Fieber                              |  |  |  |  |  |  |  |
| Husten                              |  |  |  |  |  |  |  |
| Luftnot                             |  |  |  |  |  |  |  |
| Geruchs-<br>/Geschmacksverlust      |  |  |  |  |  |  |  |
| Durchfall                           |  |  |  |  |  |  |  |
| Allg. Krankheitsgefühl              |  |  |  |  |  |  |  |
| Kopfschmerzen                       |  |  |  |  |  |  |  |
| Andere:                             |  |  |  |  |  |  |  |

|                                     |  |  |  |  |  |  |  |
|-------------------------------------|--|--|--|--|--|--|--|
| <b>Datum</b>                        |  |  |  |  |  |  |  |
| <b>Subj. Verschlechterung (j/n)</b> |  |  |  |  |  |  |  |
| Fieber                              |  |  |  |  |  |  |  |
| Husten                              |  |  |  |  |  |  |  |
| Luftnot                             |  |  |  |  |  |  |  |
| Geruchs-<br>/Geschmacksverlust      |  |  |  |  |  |  |  |
| Durchfall                           |  |  |  |  |  |  |  |
| Allg. Krankheitsgefühl              |  |  |  |  |  |  |  |
| Kopfschmerzen                       |  |  |  |  |  |  |  |
| Andere:                             |  |  |  |  |  |  |  |

Stationäre Aufnahme: Wann?:

Wo?:
