# Supplementary material for: Covid-19 in outpatients—Is fever a useful indicator for SARS-CoV-2 infection?
Source: PubMed Central journal article supplement (PMC7857607; doi:10.1371/journal.pone.0246312), 2021-02-03
Supplement: pone.0246312.s003.pdf [file pone.0246312.s003.pdf]

## Questionnaire

Household members:

Date of first symptoms:

Date of positive swab:

**Daily telephone assessment of symptoms for at least 14 days:**

**→ In case of progression inform infectious disease doctor ←**

|                                 |  |  |  |  |  |  |  |
|---------------------------------|--|--|--|--|--|--|--|
| <b>Date</b>                     |  |  |  |  |  |  |  |
| <b>Progression (yes/no)</b>     |  |  |  |  |  |  |  |
| Fever                           |  |  |  |  |  |  |  |
| Cough                           |  |  |  |  |  |  |  |
| Dyspnea                         |  |  |  |  |  |  |  |
| Loss of sense of smell or taste |  |  |  |  |  |  |  |
| Diarrhea                        |  |  |  |  |  |  |  |
| Feeling unwell                  |  |  |  |  |  |  |  |
| Headache                        |  |  |  |  |  |  |  |
| Others                          |  |  |  |  |  |  |  |

|                                 |  |  |  |  |  |  |  |
|---------------------------------|--|--|--|--|--|--|--|
| <b>Date</b>                     |  |  |  |  |  |  |  |
| <b>Progression (yes/no)</b>     |  |  |  |  |  |  |  |
| Fever                           |  |  |  |  |  |  |  |
| Cough                           |  |  |  |  |  |  |  |
| Dyspnea                         |  |  |  |  |  |  |  |
| Loss of sense of smell or taste |  |  |  |  |  |  |  |
| Diarrhea                        |  |  |  |  |  |  |  |
| Feeling unwell                  |  |  |  |  |  |  |  |
| Headache                        |  |  |  |  |  |  |  |
| Others                          |  |  |  |  |  |  |  |

Hospital Admission: Date

*Where:*
